# Supplementary material
Source: Research Square preprint supplement (doi:10.21203/rs.3.rs-9463169/v1)
Supplement: Supplementary file 1 [file 6dcf0243863cb2df35a9d973.pdf]

# RAGE

Control PULP T2DM T2DM+PULP

Control PULP T2DM T2DM+PULP

Control PULP T2DM T2DM+PULP

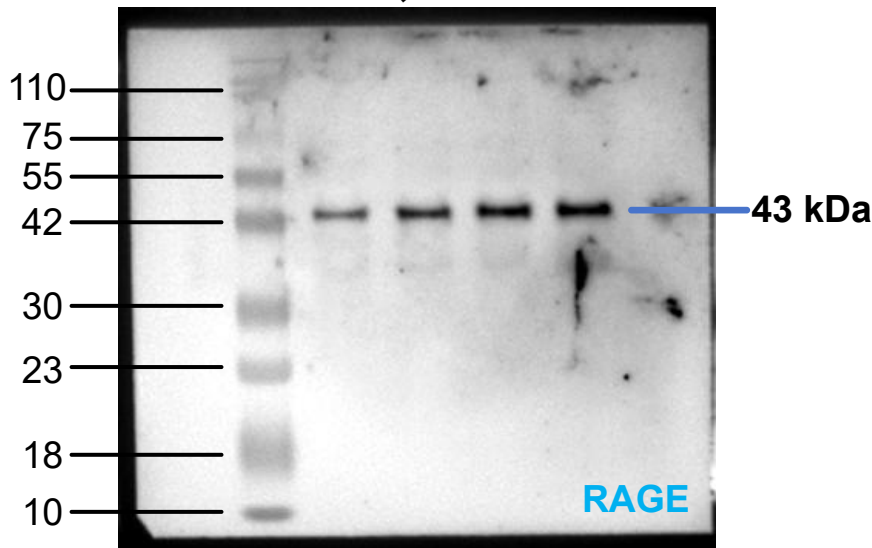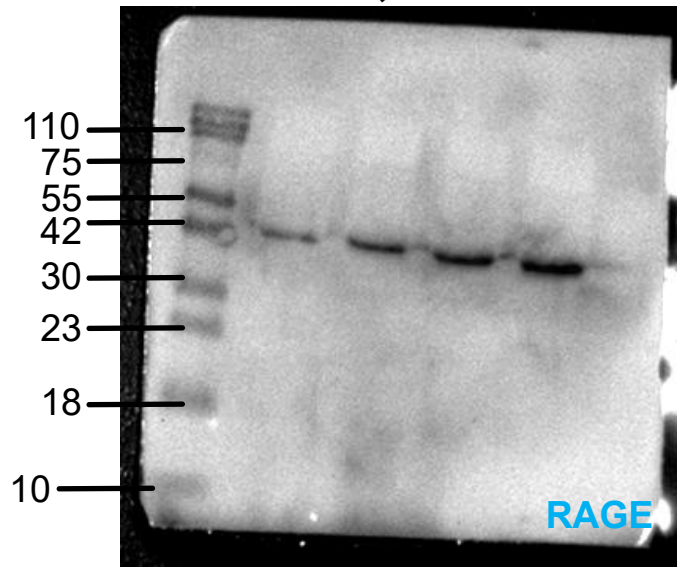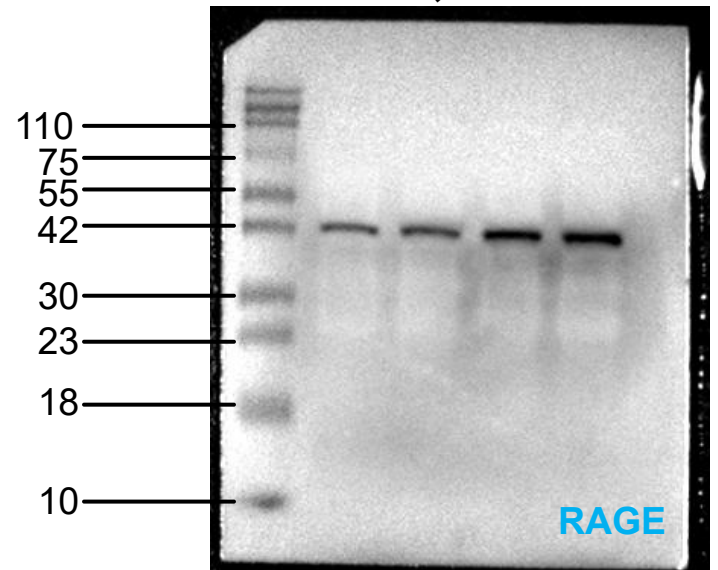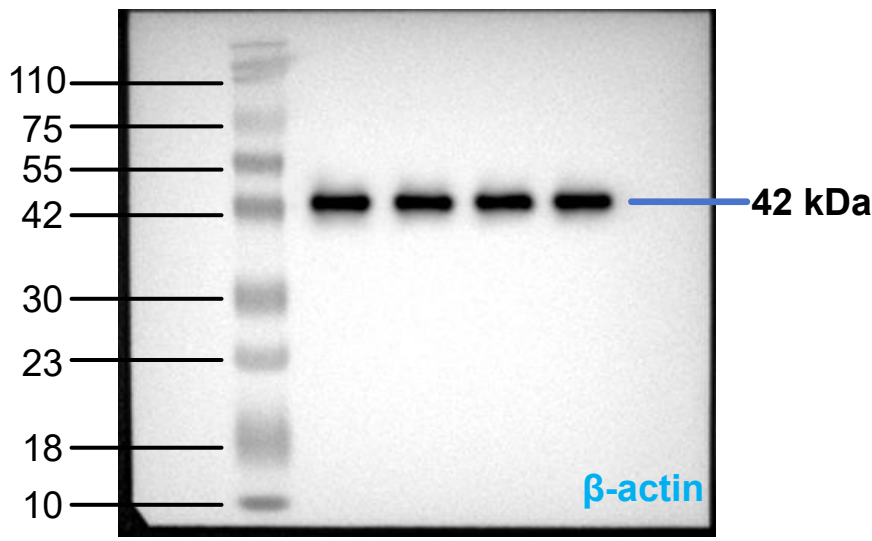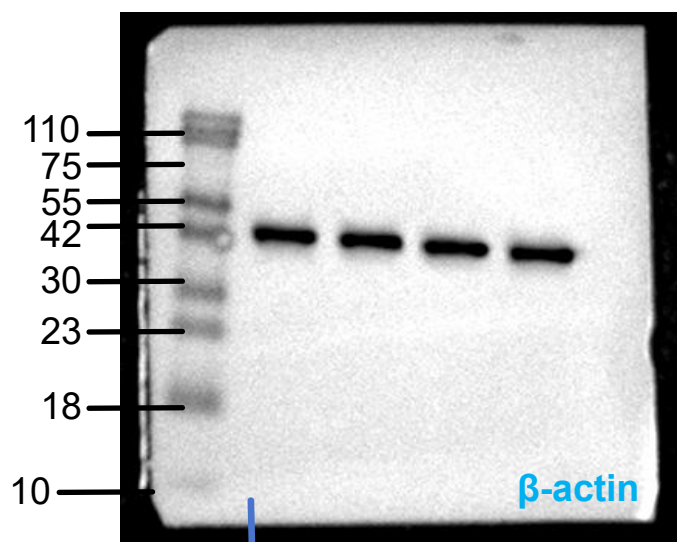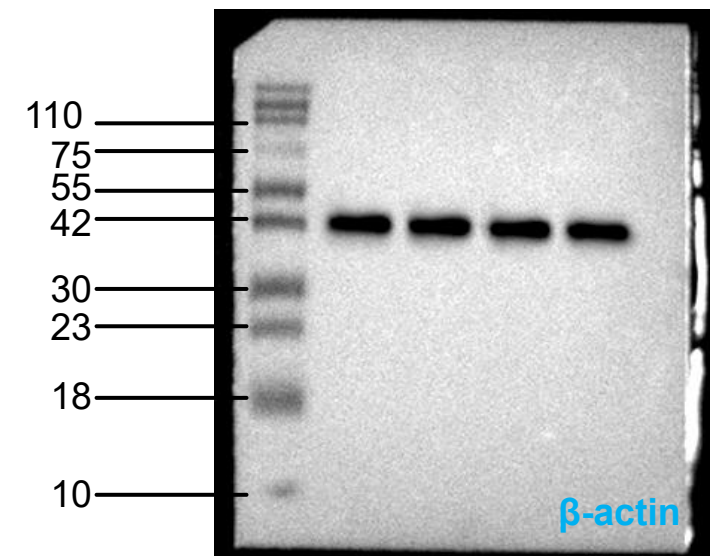

Repeat1

Fig6. H Repeat2

Repeat3

# TGF- $\beta$ 1

Repeat1

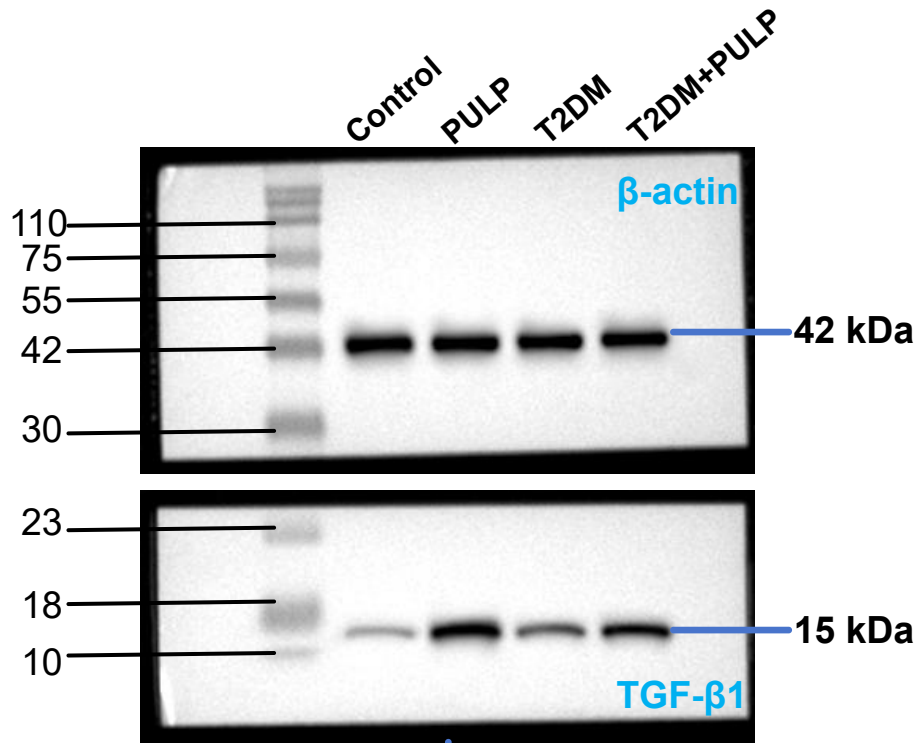

Fig4. F

Repeat2

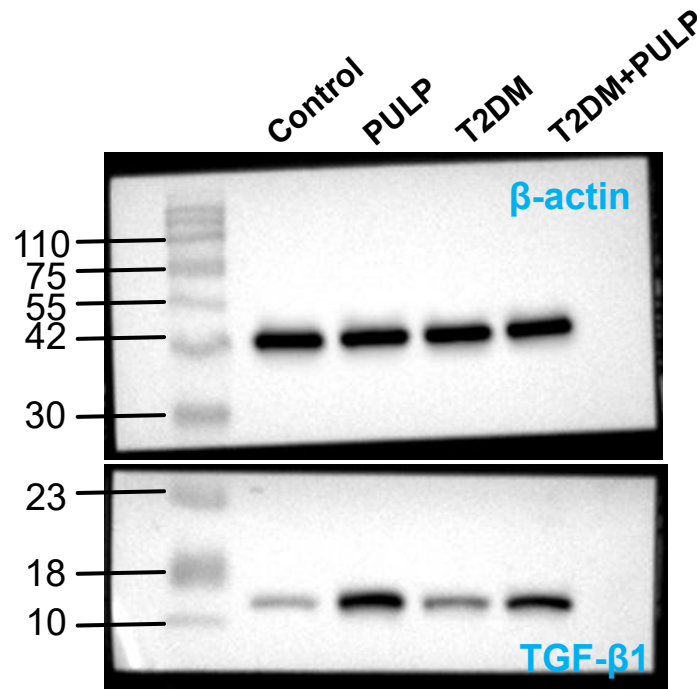

Repeat3

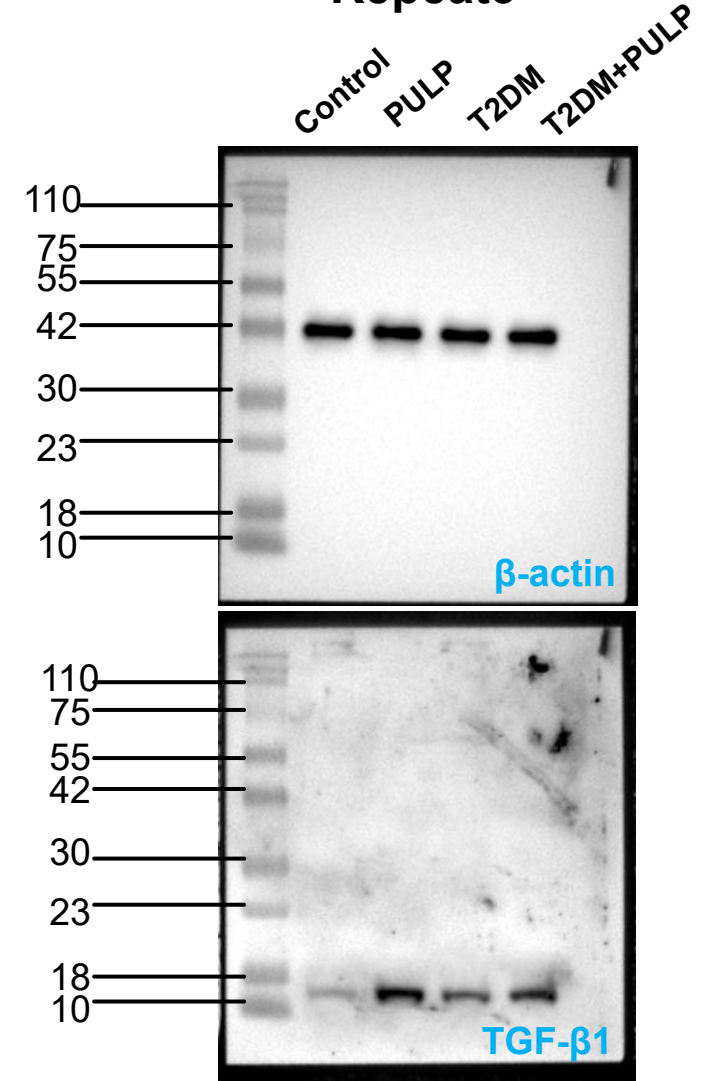

# Bax, Bcl-2, Cleaved Caspase-3

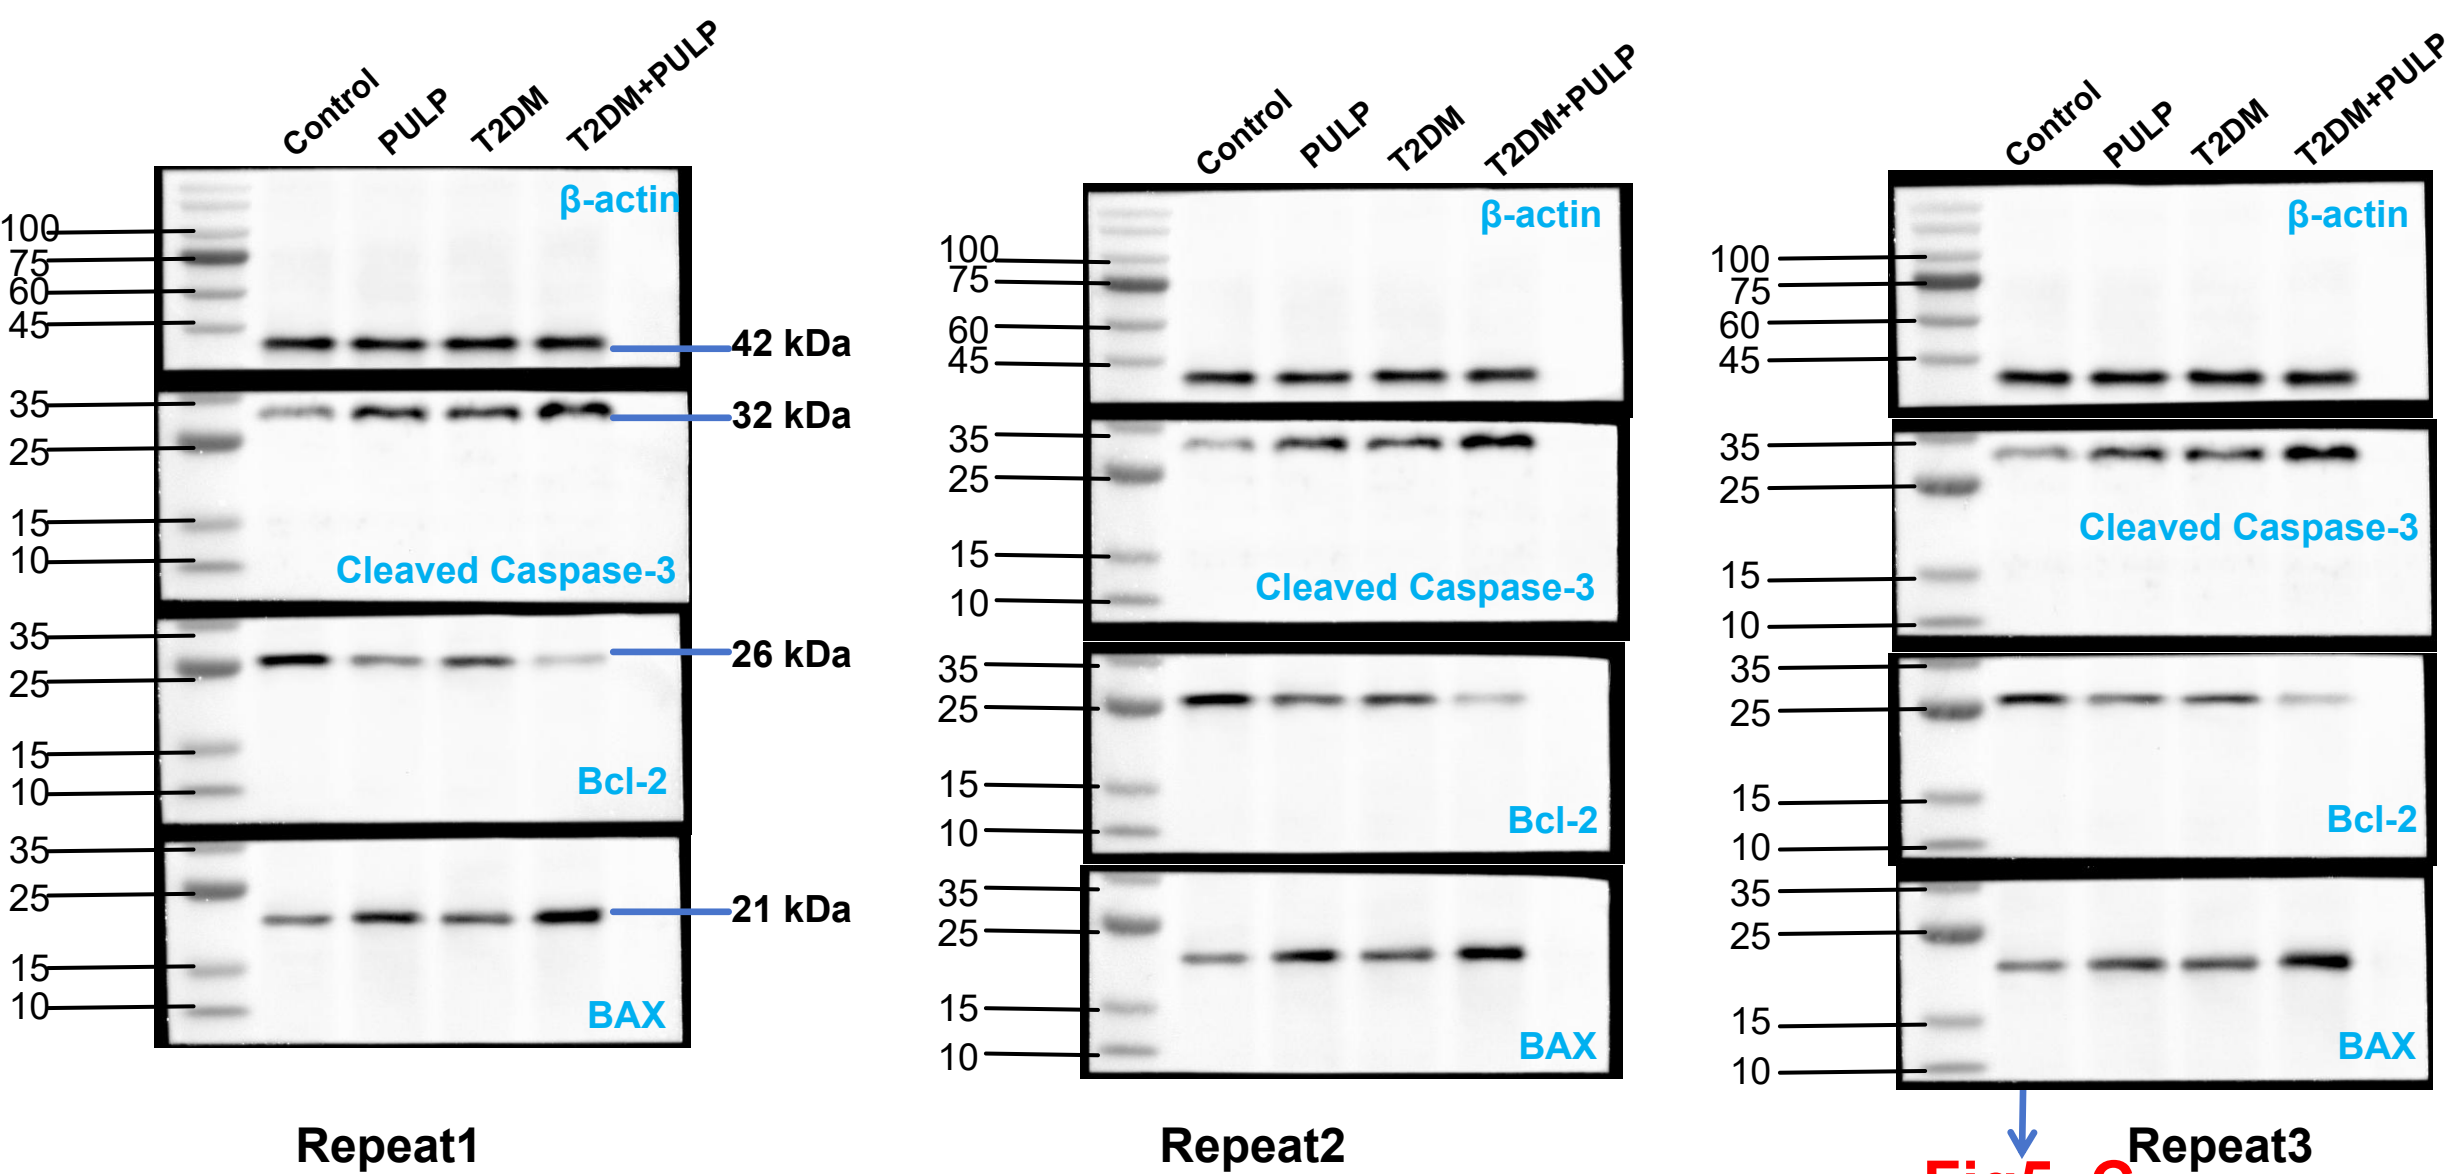

**Fig5. C**

# Bax, Bcl-2, Cleaved Caspase-3

Repeat1

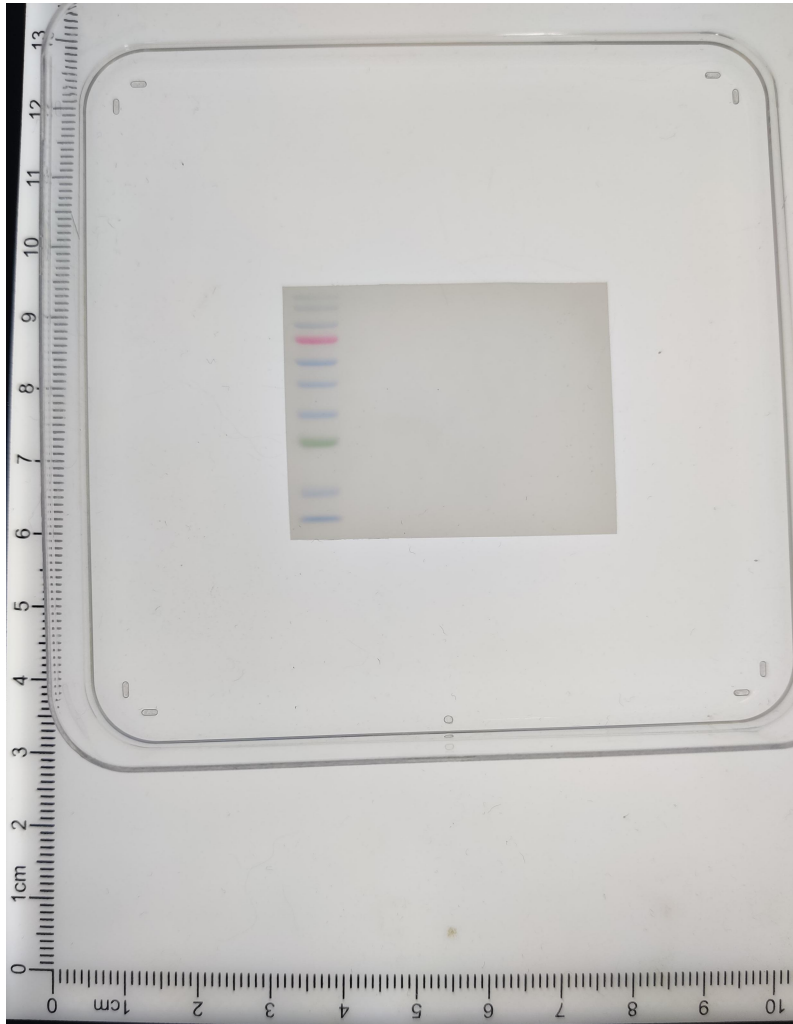

Repeat2

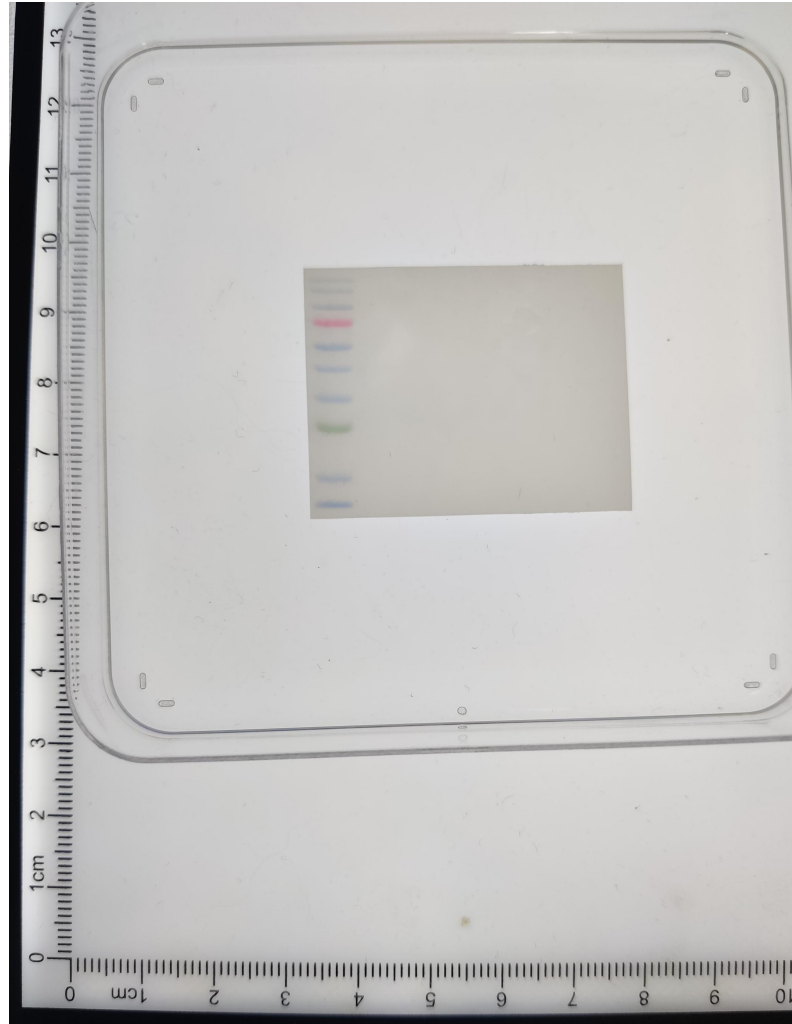

Repeat3

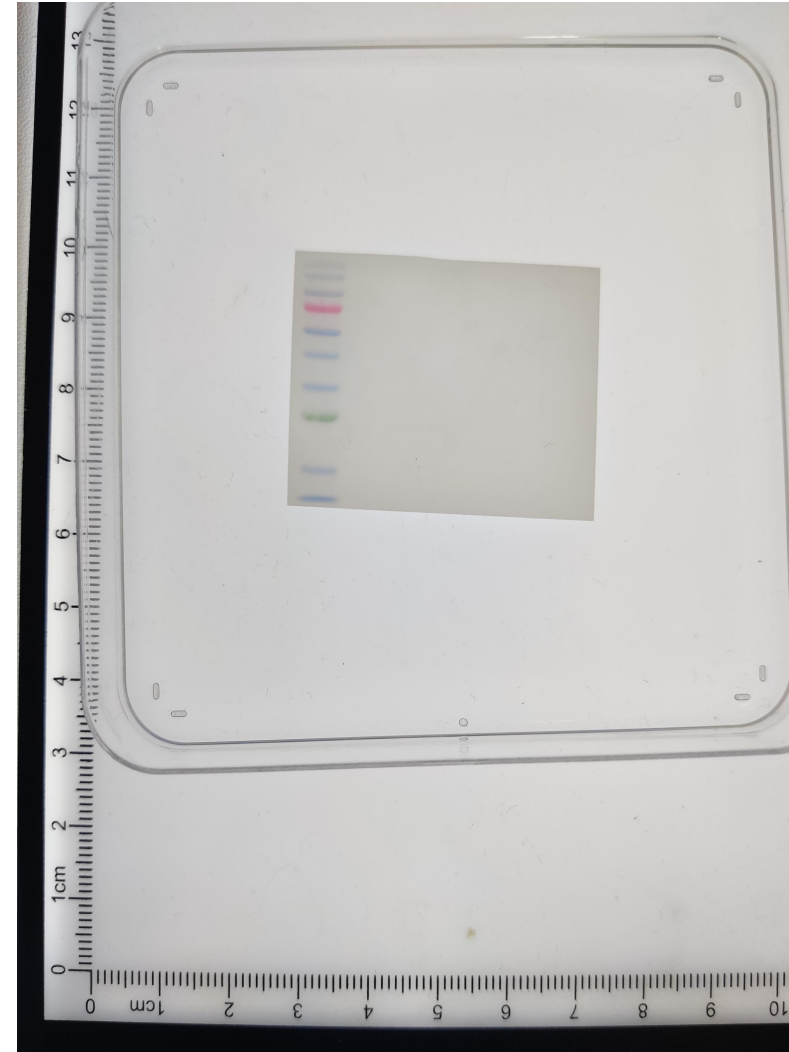

# p-ERK, p-p38

Control  
PULP  
T2DM  
T2DM+PULP

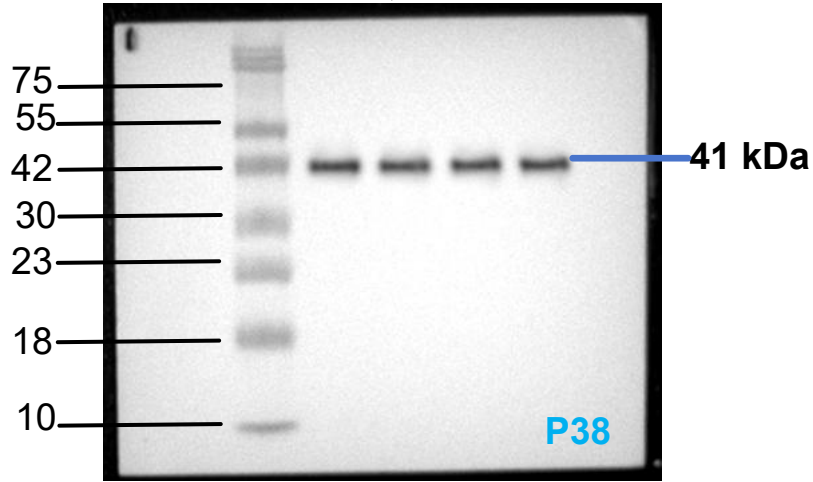

Control  
PULP  
T2DM  
T2DM+PULP

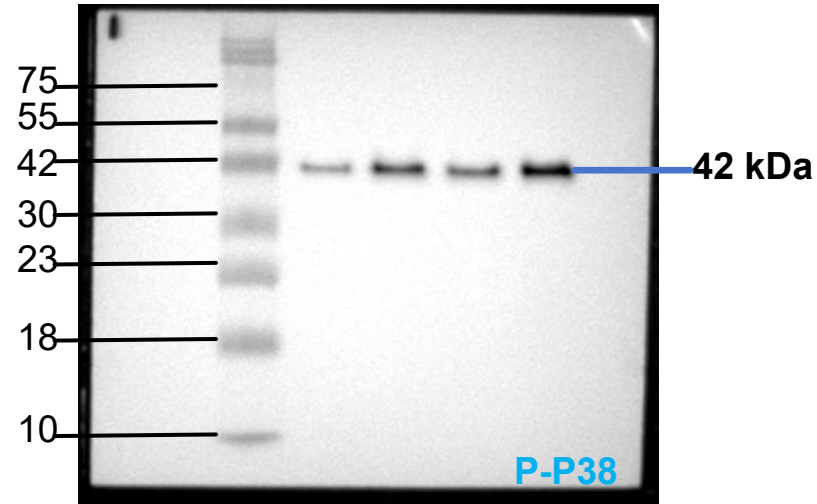

Control  
PULP  
T2DM  
T2DM+PULP

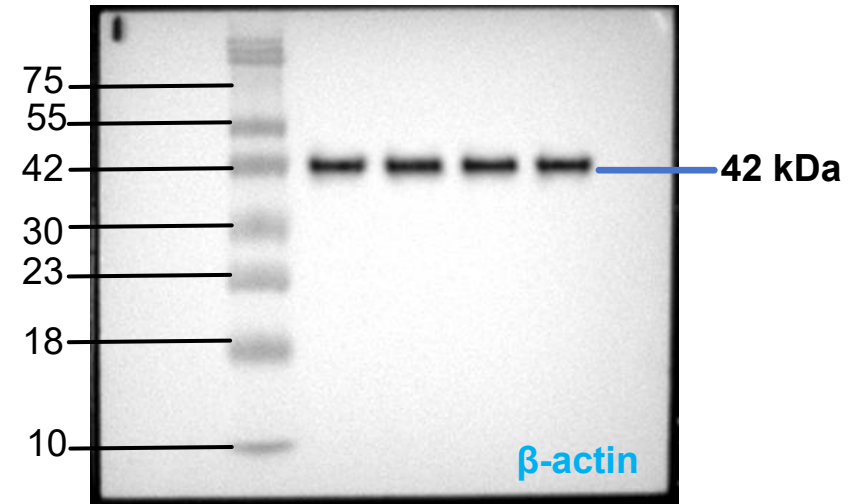

Control  
PULP  
T2DM  
T2DM+PULP

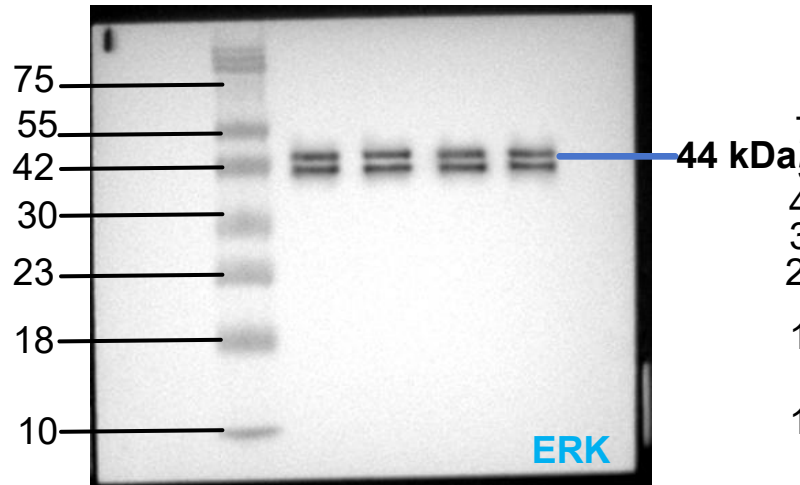

Control  
PULP  
T2DM  
T2DM+PULP

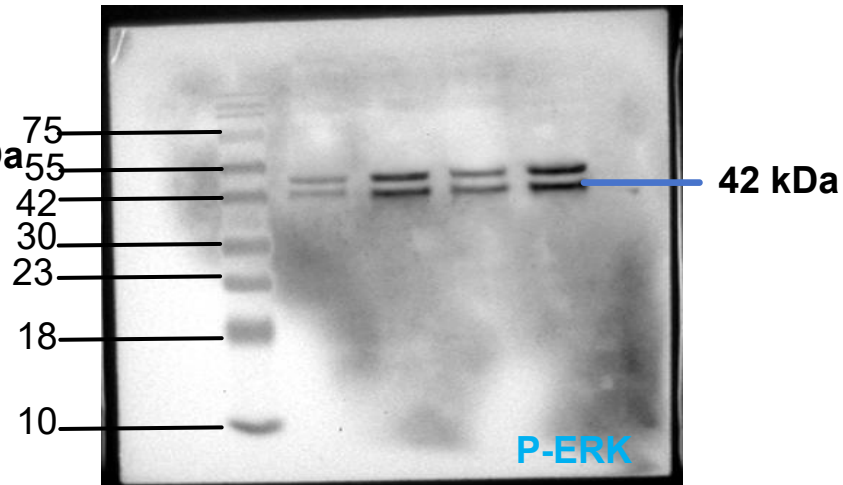

Repeat1

# p-ERK, p-p38

Control PULP T2DM T2DM+PULP

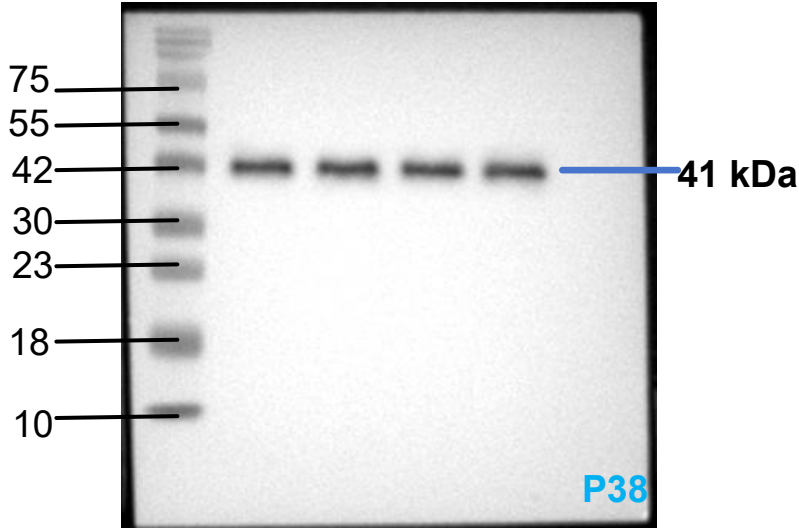

Control PULP T2DM T2DM+PULP

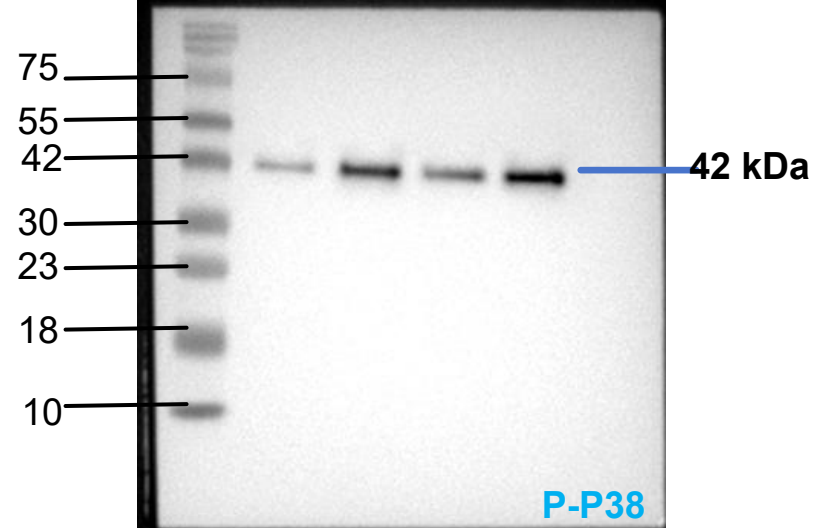

Control PULP T2DM T2DM+PULP

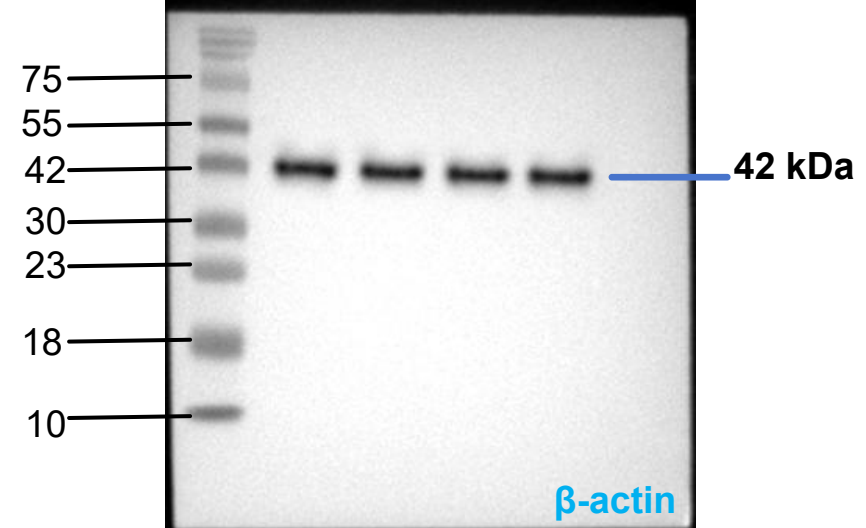

Control PULP T2DM T2DM+PULP

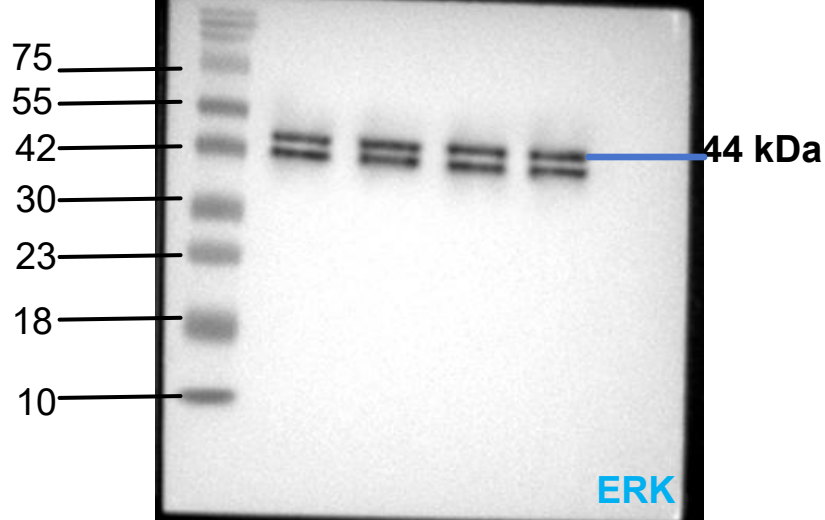

Control PULP T2DM T2DM+PULP

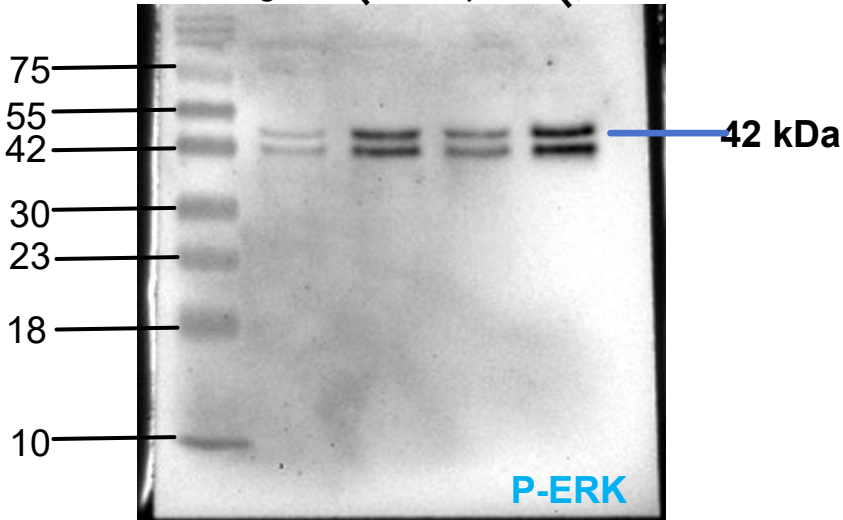

Repeat2

Fig6. I

# p-ERK, p-p38

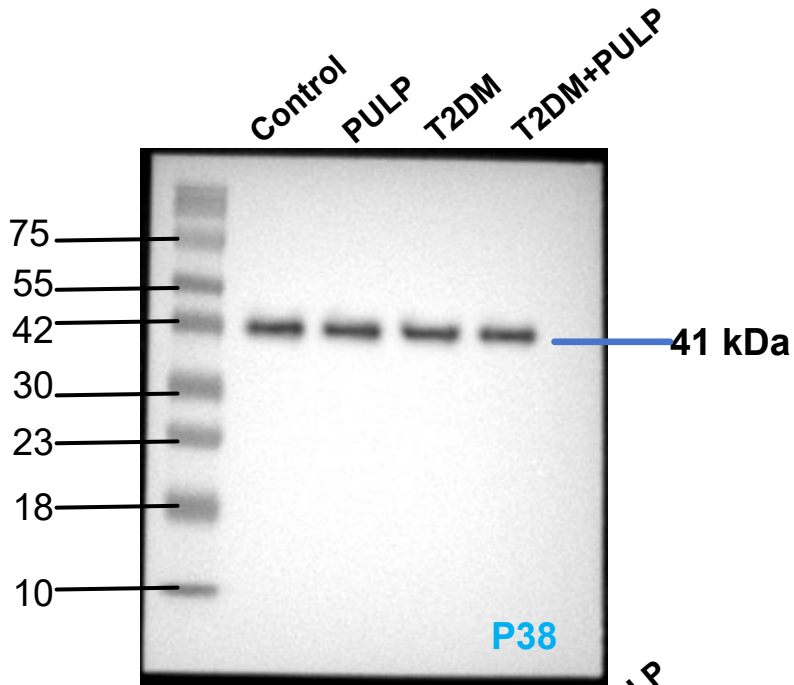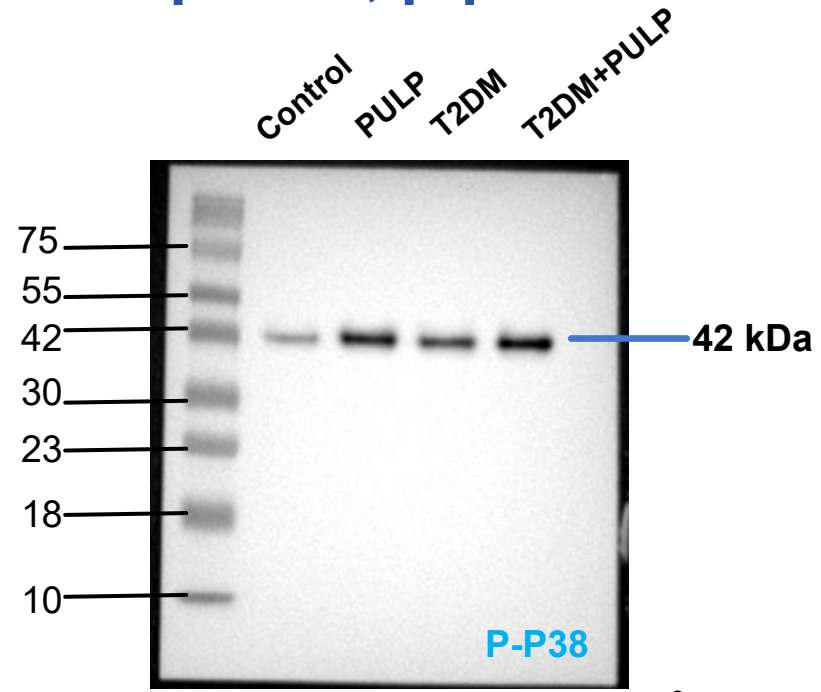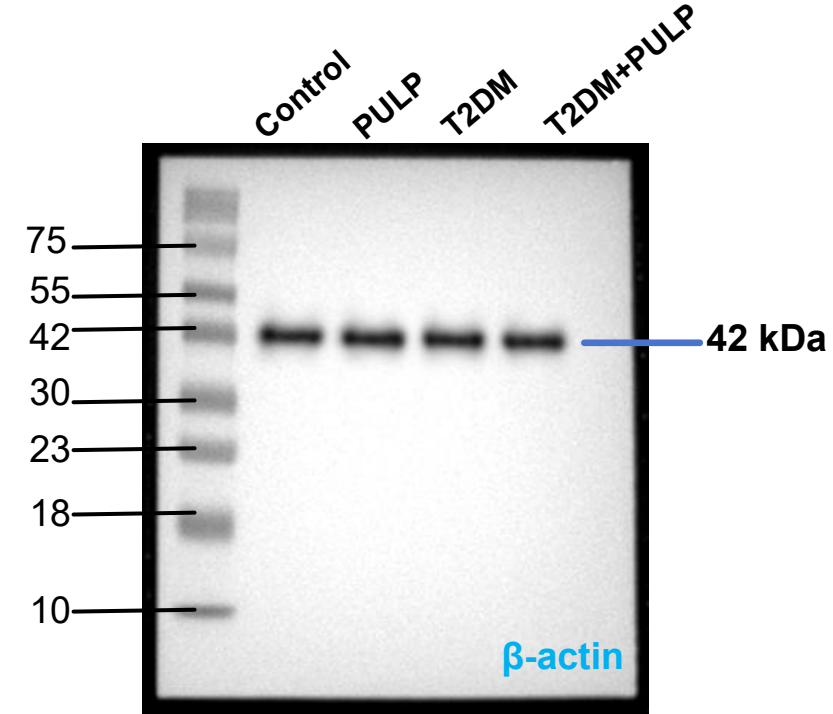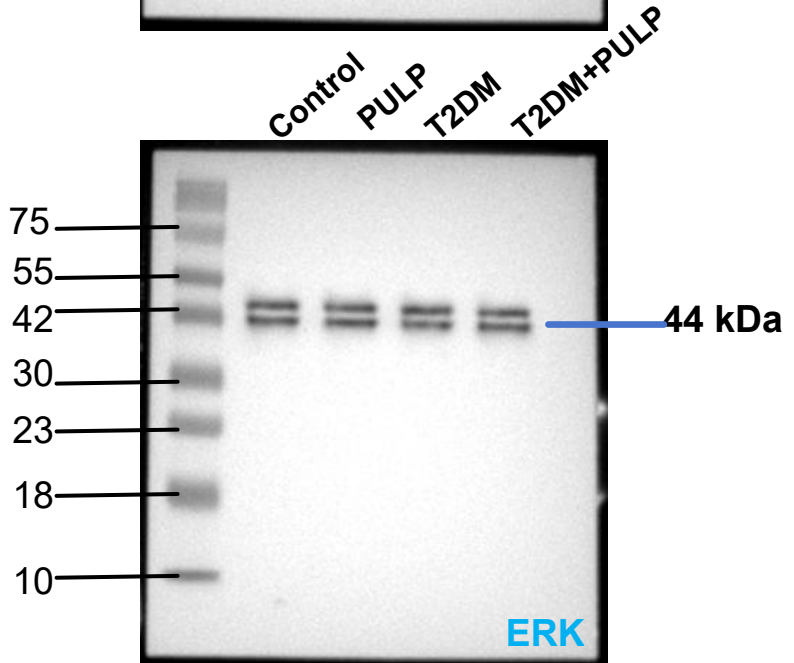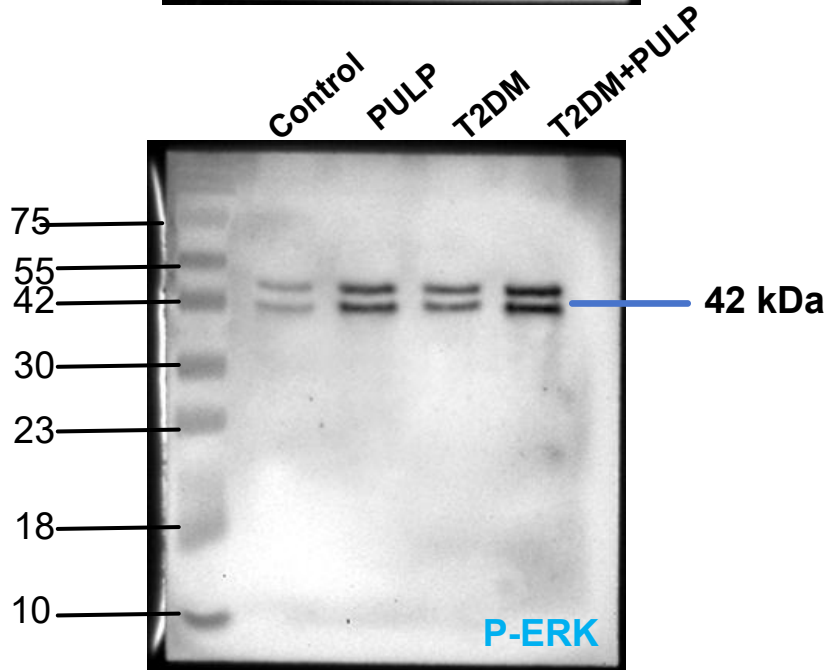

Repeat3
